# Supplementary material for: A Micro-Fabricated Force Sensor Using an All Thin Film Piezoelectric Active Sensor
Source: PubMed Central journal article supplement (PMC4299009; doi:10.3390/s141222199), 2014-11-25
Supplement: sensors-14-22199-s001.pdf [file sensors-14-22199-s001.pdf]

Supplementary Information

## A Micro-Fabricated Force Sensor Using an All Thin Film Piezoelectric Active Sensor. *Sensors* 2014, 14, 22199-22207

Junwoo Lee <sup>1</sup>, Wook Choi <sup>1</sup>, Yong Kyoung Yoo <sup>1</sup>, Kyo Seon Hwang <sup>2</sup>, Sang-Myung Lee <sup>3</sup>,  
Sungchul Kang <sup>2</sup>, Jinseok Kim <sup>2,†,\*</sup> and Jeong Hoon Lee <sup>1,†,\*</sup>

<sup>1</sup> Department of Electrical Engineering, Kwangwoon University, 447-1, Wolgye, Nowon, Seoul 139-701, Korea; E-Mails: mindsjw@gmail.com (J.L.); duddnjsi2@naver.com (W.C.); yongkyoung0108@gmail.com (Y.K.Y.)

<sup>2</sup> Korea Institute of Science and Technology (KIST), Seoul 136-791, Korea; E-Mails: kshwang@kist.re.kr (K.S.H.); kasch@kist.re.kr (S.K.)

<sup>3</sup> Department of Chemical Engineering, Kangwon National University, Chuncheon 200-701, Korea; E-Mail: sangmyung@kangwon.ac.kr

† These authors contributed equally to this work.

\* Authors to whom correspondence should be addressed; E-Mails: jinseok@kist.re.kr (J.K.); jhlee@kw.ac.kr (J.H.L.); Tel.: +82-2-958-6745 (J.K.); Tel.: +82-2-940-8372 (J.H.L).

**Figure S1.** Experimental set-up for micro-fabricated piezoelectric force sensor.

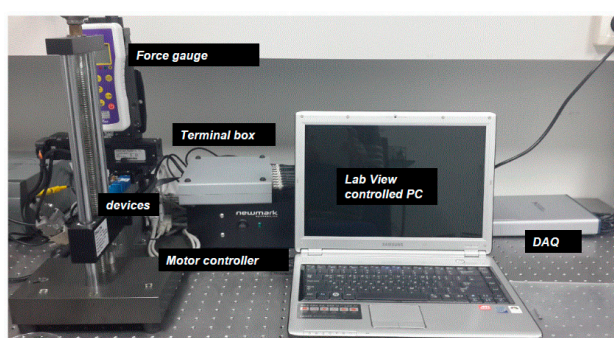

© 2014 by the authors; licensee Molecular Diversity Preservation International, Basel, Switzerland. This article is an open-access article distributed under the terms and conditions of the Creative Commons Attribution license (<http://creativecommons.org/licenses/by/4.0/>).
